# Supplementary material
Source: PubMed Central journal article supplement (PMC8572216)
Supplement: 12325_2021_1928_MOESM1_ESM.pdf [file 12325_2021_1928_MOESM1_ESM.pdf]

## **Epidemiology and Clinical Characteristics of Individuals With Hepatitis C Virus Infection in the United States, 2017 to 2019**

**Authors:** Nancy Reau<sup>1</sup>, Mark S. Sulkowski<sup>2</sup>, Emmanuel Thomas<sup>3</sup>, Vinay Sundaram<sup>4</sup>, Qingqing Xu<sup>5</sup>, Wei-Han Cheng<sup>5</sup>, Steven E. Marx<sup>5</sup>, Oscar A. Hayes<sup>5</sup>, Shivaji R. Manthena<sup>5</sup>, Viktor Chirikov<sup>6</sup>, Douglas E. Dylla<sup>5</sup>, Hannah Brooks<sup>5</sup>, Jana M. Carabino<sup>5</sup>, Sammy Saab<sup>7</sup>

<sup>1</sup>Rush University Medical Center, Chicago, IL, USA

<sup>2</sup>Johns Hopkins University School of Medicine, Baltimore, MD, USA

<sup>3</sup>University of Miami Miller School of Medicine, Miami, FL, USA

<sup>4</sup>Department of Medicine and Comprehensive Transplant Center, Cedars-Sinai Medical Center, Los Angeles, CA, USA

<sup>5</sup>AbbVie Inc., North Chicago, IL, USA

<sup>6</sup>OPEN Health, Bethesda, MD, USA

<sup>7</sup>UCLA Medical Center, Los Angeles, CA, USA

Corresponding author:

Sammy Saab, MD, MPH, AGAF

Email: [SSaab@mednet.ucla.edu](mailto:SSaab@mednet.ucla.edu)

## SUPPLEMENTARY MATERIALS

**Supplemental Table 1. Region of residence**

| Region of residence | States included in each region                                                                                                                                                                                                       |
|---------------------|--------------------------------------------------------------------------------------------------------------------------------------------------------------------------------------------------------------------------------------|
| <b>East</b>         | Connecticut<br>Delaware<br>Maine<br>Massachusetts<br>New Hampshire<br>New Jersey<br>New York<br>Pennsylvania<br>Puerto Rico<br>Rhode Island<br>Vermont                                                                               |
| <b>Midwest</b>      | Illinois<br>Indiana<br>Iowa<br>Kansas<br>Michigan<br>Minnesota<br>Nebraska<br>North Dakota<br>Ohio<br>South Dakota<br>Wisconsin                                                                                                      |
| <b>South</b>        | Alabama<br>Arkansas<br>District of Columbia<br>Florida<br>Georgia<br>Kentucky<br>Louisiana<br>Maryland<br>Mississippi<br>Missouri<br>North Carolina<br>Oklahoma<br>South Carolina<br>Tennessee<br>Texas<br>Virginia<br>West Virginia |
| <b>West</b>         | Alaska<br>Arizona<br>California<br>Colorado                                                                                                                                                                                          |

|  |                                                                                               |
|--|-----------------------------------------------------------------------------------------------|
|  | Hawaii<br>Idaho<br>Montana<br>Nevada<br>New Mexico<br>Oregon<br>Utah<br>Washington<br>Wyoming |
|--|-----------------------------------------------------------------------------------------------|

**Supplemental Table 2. Predictive performance of the machine learning algorithms and summary of SVR/cured predictions between 2017 and 2019 in SHS dataset and the 2 laboratory databases**

| <b>Dataset</b>                          | <b>Year 2017 SVR</b> | <b>Year 2018 SVR</b> | <b>Year 2019 SVR</b> |
|-----------------------------------------|----------------------|----------------------|----------------------|
| <b>Accuracy</b>                         | 0.995                | 0.989                | 0.991                |
| <b>Sensitivity</b>                      | 0.999                | 0.999                | 0.999                |
| <b>Specificity</b>                      | 0.911                | 0.669                | 0.805                |
| <b>SVR in Each Dataset</b>              |                      |                      |                      |
| <b>SHS – as observed</b>                | 94.7%                | 96.7%                | 95.8%                |
| <b>SHS – predicted</b>                  | 95.1%                | 97.8%                | 97.6%                |
| <b>Laboratory dataset 1 – predicted</b> | 95.5%                | 96.5%                | 96.0%                |
| <b>Laboratory dataset 2 – predicted</b> | 95.4%                | 96.7%                | 95.9%                |

SHS, Symphony Health Solutions (SHS) medical and pharmacy claims dataset; SVR, sustained virologic response.
